# Supplementary material
Source: HighWire-hosted journal article supplement (https://bmjopen.bmj.com/content/7/9/e016360)
Supplement: inline-supplementary-material-1 [file inline-supplementary-material-1.pdf]

## Appendix 1. Field note form.

### Field notes – participant observation

|                                                                                                                                              |                             |
|----------------------------------------------------------------------------------------------------------------------------------------------|-----------------------------|
| <b>observer:</b>                                                                                                                             | <b>date:</b>                |
|                                                                                                                                              | <b>time of observation:</b> |
| <b>place:</b>                                                                                                                                |                             |
| <b>situation</b> (short description):                                                                                                        |                             |
|                                                                                                                                              |                             |
| <b>Persons involved</b> (tick appropriate and specify if applicable)                                                                         | <b>number:</b>              |
| <input type="checkbox"/> physicians<br>position (e.g. senior physician, junior physician):<br>specialization (e.g. oncologist, radiologist): |                             |
| <input type="checkbox"/> nursing staff:                                                                                                      |                             |
| <input type="checkbox"/> other clinical staff, please specify:                                                                               |                             |
| <input type="checkbox"/> non-clinical staff, please specify:                                                                                 |                             |
| <input type="checkbox"/> patient:                                                                                                            |                             |
| <input type="checkbox"/> other persons, please specify:                                                                                      |                             |
| <b>observation memo:</b>                                                                                                                     |                             |
|                                                                                                                                              |                             |
